# Supplementary material
Source: PubMed Central journal article supplement (PMC2277511)

Supplemental Figure. Rescue of flying impairments in 128Qhtt<sup>FL</sup> flies by one mutant copy of *Syntaxin 1A*

Flying ability of 25-day-old flies was measured as in Figure 3C. Note that flying ability is significantly different in 128Qhtt<sup>FL</sup> flies and 128Qhtt<sup>FL</sup> flies also carrying a heterozygous loss of function mutation in *Syx* ( $p < 0.05$ , Mann-Whitney test). Genotypes: C164 (C164-GAL4/+), C164-GFP (C164-GAL4/UAS-GFP), C164-16Qhtt<sup>FL</sup> (C164-GAL4/UAS-16Qhtt<sup>FL</sup>[M28]), C164-128Qhtt<sup>FL</sup> (C164-GAL4/UAS-128Qhtt<sup>FL</sup>(s)[M36E2]), C164-128Qhtt<sup>FL</sup>/*Syx*<sup>229</sup> (C164-GAL4/UAS-128Qhtt<sup>FL</sup>(s)[M36E2]; *Syx*<sup>229</sup>/+).

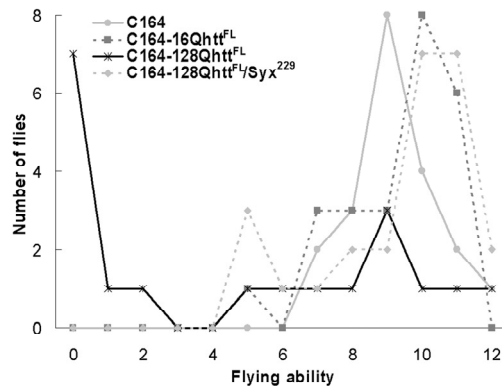

Supplement: NIHMS37913-supplement-01.pdf [file NIHMS37913-supplement-01.pdf]
